# Supplementary material
Source: ML conference proceedings conference paper supplement (https://openaccess.thecvf.com/content/CVPR_2020/html/Yang_Telling_Left_From_CVPR_2020_paper.html)
Supplement: Supplementary file 1 [file Yang_Telling_Left_From_CVPR_2020_supplemental.zip]

Archive with 3 entries (3 files):
- supp_flipped_audio.mkv
- supp_original_audio.mkv
- Telling_Left_from_Right__Learning_from_Video_with_Spatial_Audio__Supp_(1).pdf
